# Supplementary material for: Silver Nanoparticles Biocomposite Films with Antimicrobial Activity: In Vitro and In Vivo Tests
Source: MDPI journal article supplement (doi:10.3390/ijms231810671), 2022-09-14
Supplement: s1 [file s1]

# Silver Nanoparticles Biocomposite Films with Antimicrobial Activity: In Vitro and In Vivo Tests

Anca Niculina Cadinoiu <sup>1</sup>, Delia Mihaela Rata <sup>1,\*</sup>, Oana Maria Daraba <sup>1</sup>, Daniela Luminita Ichim <sup>1</sup>, Irina Popescu <sup>2</sup>, Carmen Solcan <sup>3</sup> and Gheorghe Solcan <sup>3</sup>

<sup>1</sup> Faculty of Medical Dentistry, "Apollonia" University of Iasi, 700511 Iasi, Romania

<sup>2</sup> Petru Poni Institute of Macromolecular Chemistry, 700487 Iasi, Romania

<sup>3</sup> Faculty of Veterinary Medicine, "Ion Ionescu de la Brad" Iasi University of Life Sciences, 700489 Iasi, Romania

\* Correspondence: delia.rata@univapollonia.ro

## Supplementary Materials:

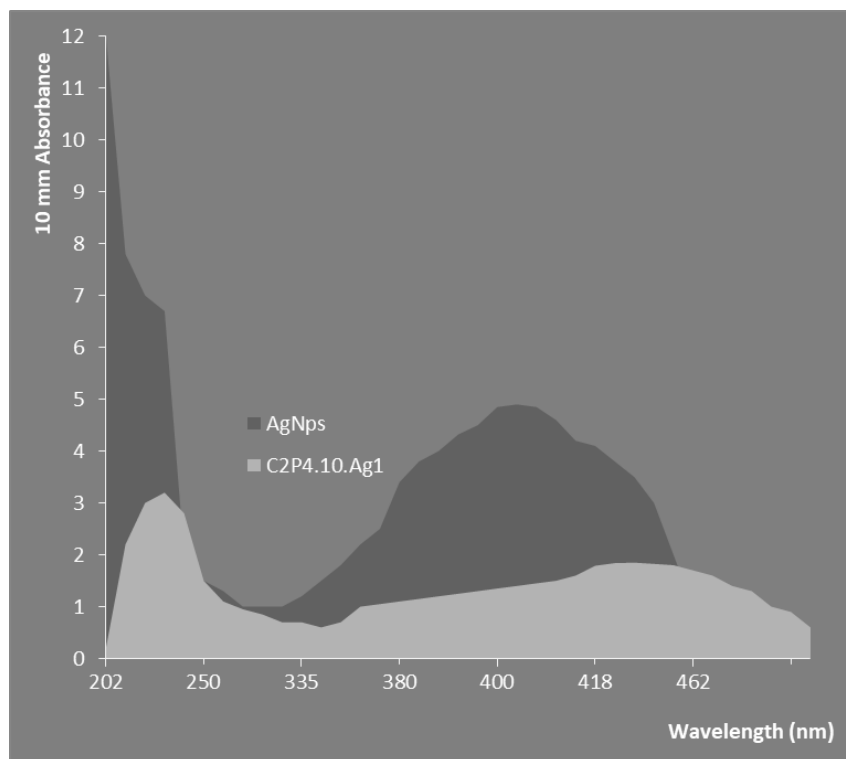

**Figure S1.** UV-Vis spectroscopy results for AgNps and C2P4.10.Ag1 film samples after 24 h of stirring in water
